# Supplementary material for: Using Garden Cafés to engage community stakeholders in health research
Source: PLoS One. 2018 Aug 10;13(8):e0200483. doi: 10.1371/journal.pone.0200483 (PMC6086403; doi:10.1371/journal.pone.0200483)
Supplement: S1 Text — (CSV) [file pone.0200483.s001.csv]

1	SHAC		2	2	2	55901	0	1	0	0	0	2	1	1	0	0	0	0	0	5	3	1	1	1	8	8	8	8	8	8	8		8	8	5	8	5	8	I wonder if a blood glucose check could also be incorporated into an event like this one.	2
2	SHAC		2	1	1	55902	1	0	0	0	0		0	0	0	0	0	0	0			1		2	8	8	8	6	8	8	8	8	8	8	6	6	8	8	Behavior intervention research for positive health outcomes.	0
3	SHAC		2	1	1	55904	1	0	0	0	0	2	0	0	0	0	0	0	0	5	5	1	1	2	8	8	8	8	8	8	8	8	8	8	4	4	6	6	Please be accountable to the community when you conduct research.	2
4	SHAC		3	1	1	55901	1	0	0	0	0	2	1	0	0	0	1	1	0				1	1	6	5	5	5	5	8	8	8	8	8	5	8	5	8		0
5	SHAC		2	1	1	55904	1	0	0	0	0	2	1	0	0	1	0	0	0	4	4	1		2	4	5	4	3	4	4	3	4	4	5	4	5	5	4	Hypertension is important in the Somali community. We need to focus on this topic in the following meeting.	2
6	SHAC		2	1	1	55904	1	0	0	0	0	2	1	1	1	1	0	0	0	5	5	1	1	1	4	5	4	4	7	5	8	8	6	6	2	6	3	6	Study of disease more prevalent to Somali population. or more information of what we can do to help.	2
7	SHAC		2	1	1		1	0	0	0	0	2	0	0	0	0	0	0	0			1	1	2		5	4	4	4		6									0
8	SHAC		2	1	1	55904	1	0	0	0	0	2	0	0	0	0	0	0	0	5	5	1	1	2	3	3	3	4	3	4	4	5	5	4	4	5	4	5		2
9	SHAC		3	2	2		1	0	0	0	0	2	1	0	0	0	0	0	1	4	4	1		1													8	8		0
10	SHAC		3	1	1	55901	1	0	0	0	0	2	1	0	1	1	0	1	0	5	5	1	1	1	5	3	8	8	8	8	8	8	8	8	8	8	8	8	Drug dependency & obesity	2
11	SHAC		2	2	2		1	0	0	0	0	2	1	0	1	1	0	1	0	5	5	1		2	8	8	8	8	8	8	8	8	8	8	8	8	8	8	Skin bleaching among colored women	2
12	SHAC		2	1	1	55904	1	0	0	0	0	2	0	0	0	0	0	0	0	4	4		1	2	5	5	3	5	5	6	6	5	6	6	5	6	5	8		0
13	SHAC		5	1	1	55901	1	0	0	0	0		1	0	1	1	0	0	0	5	5	1	1	1	8	8	8	8	8	8	8	8	8	8	8	8	8	8	I am interested to see as many research projects as possible for our minority communities	2
14	SHAC			1	1	55901	1	0	0	0	0	2	0	0	0	0	0	0	0	5	4	2	2	2	6	6	6	6	8	6	6	5	8	8	4	6	6	6		0
15	SHAC		2	1	1	55902	1	0	0	0	0	2	1	0	0	0	1	0	0	5	5	1		1	3	3	3	2	2	8	6	8	8	8	2	8	2	8	Mental health, infectious diseases, bacterial infections	2
16	SHAC		2	1	1	55902	1	0	0	0	0	2	1	0	0	0	1	0	0	5	5	1		1	3	3	3	2	2	8	6	8	8	8	2	8	2	8	Mental health, infectious diseases, bacterial infections	2
17	Mayo Clinic Speaker Series at Madonna Towers		2	1	1	55901	0	1	0	0	0	2	1	1	1	0	0	0	0	4	4	1	2	2	4	5	2	6	6	6	6	4	6	6	5	5	8	8		2
18	Mayo Clinic Speaker Series at Madonna Towers		6	2	2	55901	0	1	0	0	0	2	0	0	0	0	0	0	0			1																		0
19	Mayo Clinic Speaker Series at Madonna Towers		4	2	2	55901	0	1	0	0	0	2	1	1	1	0	0	1	0	4	4	1	2	2	2	3	3	3	8	5	5	4	6	8	8	8	8	8	Long talk, too detailed for this crowd. Very interesting; good public speaker	2
20	Mayo Clinic Speaker Series at Madonna Towers		6	2			0	1	0	0	0	2	0	0	0	0	0	0	0																		7			0
21	Mayo Clinic Speaker Series at Madonna Towers		4	1	1	55901	0	1	0	0	0	2	0	0	0	0	0	0	0	3		1	1	3	2	2	2	2	2	3	3	3	3	3	8	8	2	4	More entertaining, less science. This group wanted something to 'take away.'	2
22	Mayo Clinic Speaker Series at Madonna Towers		6	2	2	55901	0	1	0	0	0	2	0	0	0	0	0	0	0	4	4	1	2	1	2	2	2	3	2	4	4	4	4	4	7	3	2	4		2
23	Mayo Clinic Speaker Series at Madonna Towers		6	2	2	55904	0	1	0	0	0	2	0	0	0	0	0	0	0	5	4	1	1	2	2	7	3	3	2	6	6	5	6	5	4	7	6	8		2
24	Community conversation about housing	My neighbor	2	2	2	55901	1	0	0	0	0	2	0	0	0	0	0	0	0			1	1	2	6	6	5	6	6	6	6	5	6	6	4	6	4	6		0
25	Community Garden	phone call	5	2	2	55904	0	1	0	0	0	1	1	0	1	1	0	1	0	5	5		1	1	4	4	4	3	4	6	6	8	6	8	4	8	4	8	Business entrepreneurs Food catering	2
26	Community Gardents	Sunday service	2	2		55963	1	0	0	0	0	2	0	0	0	0	0	0	0	4	4		1	2	4	4	5	3	4	5	6	8	4	5	4	5	5	5	Love the idea. Sign me up next season.	2
27	Community Garden conversation	Miguel	5	1	1	55901	1	0	0	0	0	2	1	0	1	0	0	0	0	5		1	1	1	5	6	5	6	5	8	8			8			5	8		0
28	Fair Affordable Housing	My friend Marvin	5	1	1	55904	1	0	0	0	0		1	0	1	0	0	0	0	3	5	1	1	2	2	2	2	2	8						7				right now fair low housing is the best right now	0
29			3		1		0	0	0	0	0	1	0	0	0	0	0	0	0			1	1		5	5	5	5	5	8	8	8	8	8	8	8	8	8		0
30	Juntos	Miguel	4	2	2	55902	0	1	0	0	0	1	0	0	0	0	0	0	0	5	5	1	1	1	7	2	2	7	2	4	2	8	6	8	7	2	7	7	topics based on health insurance more information on mental health	2
31	Juntos	Miguel	6	1	1	55960	0	1	0	0	0	1	0	0	0	0	0	0	0	5	5	1	1	1	6	8	8	8	8						8		8		Senior involvement, how senior can volunteer	0
32	Juntos	through Juntos	2	2	2	55904	0	1	0	0	0	1	1	0	1	0	1	1	0			1	1		3	8	6	5	8						8			8	Cancer	0
33	Juntos	Juntos	4	2		55904	0	1	0	0	0	1	1	0	1	1	0	1	0	5	5	1	1	1	3	8	6	5	6						8		8		Learn about cancer	0
34	Juntos	Phone call	4	2	2	55904	0	1	0	0	0	1	1	0	0	1	0	0	0	4	4	1	1		8	8	8	5	4						5		8		to have more information in different language	0
35	Juntos	phone call/mom	1	2	2	55902	0	1	0	0	0	1	0	0	0	0	0	0	0	5	5	1	1	1	7	3	3	4	7	7	5	5	4	2	7	5	4	5	the newer financial helps there are for the people of middle income to low middle income.	0
36	Juntos Club	school	2	2	2	55945	0	1	0	0	0	2	1	0	1	0	0	0	0	4	4	2	2	1	8	8	8	8	8	8	8	8	8	8	4	4	4	4		2
37	Juntos Club	school	6	2	2	55945	0	0	1	0	0	2	1	0	1	0	1	0	0	4	4	2	2	1	8	8	8	8	8	8	8	8	8	8	8	8	8	8		2
38	Juntos		5	1	1	55904	0	0	0	0	0	1	1	0	0	1	0	0	0	5	5	1	1	1	8	8	8	8	8	8	8	8	8	8	4	6	8	8		2
39	Juntos	Juntos	3	1	1	55920	0	1	0	0	0	2	0	0	0	0	0	0	0	4	4	2	1	1	4	4	6	4	4	4	5	6	6	5	5	5	5	6	Health-related issues regarding sedentary lifestyles	2
40	RCBC	Pastor Barlow	5	2	1	55949	1	0	0	0	0	2	1	0	0	0	0	1	0	1		1		1	7	5	8	8	7	7	8	8	8	8	6		8		multiple chronic conditions	0
41	RCBC		2	2	2	55904	1	0	0	0	0	2	1	0	1	0	0	0	0	5	3	1	1	2	4	8	6	8	6	4	8	6	8	6	6	6	6	6		2
42	RCBC	church	3	2	2	55904	1	0	0	0	0		1	0	1	0	0	1	0			1	1	2	7	5		5	5	3	5		5	5	6	6	5	5		0
43	RCBC		5	1	1	55904	1	0	0	0	0	2	1	0	0	0	0	1	0	5	5	1	1	1	8	8	8	8	8	6	8	8	8	8	8		8	8		0
44	RCBC		4	2	2		1	0	0	0	0	2	0	0	0	0	0	0	0	4	4			2	5	5	4	5	4						4		5		To know more about health Education	0
45	RCBC		5	2	2	55904	1	0	0	0	0	2	1	0	0	0	0	0	1	5	5	1	1	1	8	8	8	8	8	8	8	8	8	8	8	8	8	8		0
46	RCBC	church	2	2	2	55904	1	0	0	0	0		0	0	0	0	0	0	0	3	3	1	1	2	4	4	3	4	5	4	5	4	4	4	4	4	4	5		0
47	RCBC	through church	3		1	55904	1	0	0	0	0	2	0	0	0	0	0	0	0	4	4	1	1	1	5	6	6	8	6	6	6	6	8	8	8	8	8	8	more of how to link others with more information of health serves in any kind of way	2
48	RCBC	church	6	1	1	55904	1	0	0	0	0	2	1	0	0	0	0	1	0	5	4	1	1	2	3	4	3	2	3	3	6	5	2	4	4	5	5	8	Explain research methodology	2
49	Madonna Towers Seminar		3	2	2	55901	0	1	0	0	0	2	0	0	0	0	0	0	0	4	5		1	1	4	6	6	6	6	6	8	8	8	6	5	8	6	8	Alzheimers research & any new drugs 'cures avail.	2
50	Madonna Towers		6	2	2	55906	0	1	0	0	0	2	0	0	0	0	0	0	0	5	5	1		1	7	7	7	7	7	4	4	4	6	4	7	7	8			0
51	Madonna Towers		6	2	2	55901	0	1	0	0	0	2	0	0	0	0	0	0	0	5	5	1		1	3	7	2	2	2	6	5	6	6	8	2	8	2	6		0
52	Madonna Towers		6	2	2		0	1	0	0	0		0	0	0	0	0	0	0	5	5	1		1	6	3		5	3	8	5		8	5	7	3	3	6		0
53	Madonna Towers		6	2	2	55901	0	1	0	0	0	2	1	0	1	0	0	0	0	5	5	1		1	7	7	7	7	7	5	3	4	3	3	4	8	3	5		0
54	Church Listening Session, RCBC	Church	3	1	1	55902	1	0	0	0	0	1	0	0	0	0	0	0	0	1	5	1	1	2	8	8	7	7	7	8	7	7	7	8	8	7	8	8	Book would be helpful. Going here learned something. Pray, read Bible every day.	2
55	Listening Session, RCBC	Don (Barlow)	3	1	1	55902	1	0	0	0	0	2	0	0	0	0	0	0	0	4	3	1	2	1	8			2	7			3	7	2	8	8	6	2		2
56	Gibbs Lecture	AD MERG BHM Calendar	2	2	2	55902	0	0	1	0	0	2	0	0	0	0	0	0	0	5	5	1	1	1		2	4	8	2	3	6	8	8	4	4	4	4	4		2
57	Gibbs Lecture	AD Merg	2	2	2	55902	1	0	0	0	0	2	0	0	0	0	0	0	0	5	5	1	1	1	5	2	4	4	4	2	6	4	4	4	4	4	4	4		2
58	Gibbs Lecture	Collenger	2	1	1		0	0	0	0	0		1	0	0	1	0	0	0	5	5	1			6	8	8	8	8						6		8		We need to invite more speakers to talk about race id disparities.	2
59	Gibbs Lecture	Mayo Clinic	4	1	1	55904	1	0	0	0	0	2	1	0	0	0	1	0	0	5	5	1	1	1	4	4	4	4	5	8	8	8	8	8	6	8	6	8		2
60	Gibbs Lecture		6	1	1	55901	0	1	0	0	0	2	0	0	0	0	0	0	0	5	3	1		1		3	3	4	4		5	8	6	6	2	2				2
61	Gibbs Lecture	flyer	6		1	55904	1	0	0	0	0			0	0	0	0	0	0	5		1	1		8	8														2
62	Gibbs Lecture		5	1	1		1	0	0	0	0	2	1	0	0	0	0	0	0	4	4	1		2																2
63	Gibbs Lecture	Mayo Staff	4	2	2	55904	0	1	0	0	0	2	0	0	0	0	0	0	0	1		1	1	1																2
64	Gibbs LEcture	web	5	1	1	55902	1	0	0	0	0	2	1	0	0	0	0	0	1	5	3	1		2	8	8	8	8	8								8	8		2
65	Gibbs Lecture		4	1	1	55902	1	0	0	0	0	2	0	0	0	0	0	0	0	5	5	1	1	1	7		2	2	2	8	5	8	8		4	8	3			2
66	Gibbs Lecture	relatives	2	1	1	55906	1	0	0	0	0	2	1	0	0	1	0	0	0	5	3	1		1		6		6			6		8		8	8	6	6		2
67	Gibbs Lecture	Ad merg	3	2	2	55901	1	0	0	0	0	2	1	0	1	1	0	1	0	5	5	1		1	6		6	3	7	8	8	8	8	8	4	8				2
68	Gibbs lecture	George Gibbs lecture	6	2	2	55906	0	1	0	0	0	2	1	0	0	0	0	0	1	5	4	1	1	1			8	2	2					8	6	5	4	6		2
69	Gibbs Lecture	email	3	2	2	55906	1	0	0	0	0	2	0	0	0	0	0	0	0	5	2	1	1	1		8	6	8	8		8	6	8	8	4	4	8	8		0
70	Gibbs Lecture	Post Bulletin	6	1	1	55901	0	1	0	0	0	2	1	0	1	0	0	0	0	4	4	1		1	4	4	4	3	4	4	4	4	3	4	4	5	6	6		2
71	Gibbs Lecture	group	4	1	1	55901	1	0	0	0	0	2	1	0	0	0	0	0	0			1		1	8	8	8	8	8	8	8	8	8	8						2
72	Gibbs Lecture	newspaper	6	1		55904	0	1	0	0	0	2	1	0	0	0	1	0	0	5				1											5	5	8	8		2
73	Gibbs Lecture	twitter/co-worker	4	2	2	55902	0	0	0	1	0	2	1	0	1	1	0	1	0	5	5	1	1	1	8	8	8	8	8	8	8	8	8	8	5	5	8	8	Better awareness of the event. I was aware of it at the last minute.	2
74	Gibbs Lecture		5	2	2	55902	1	0	0	0	0		1	0	0	0	0	1	0			1		2	6	6	5	6	8	8	8	8		6	5	5	6	6		2
75	Gibbs Lecture	email	2	2	2	55901	0	0	1	0	0	2	0	0	0	0	0	0	0	5	5	1	1	1	5	5	5		6	5	8	8	8	8	5	5	6	8	Dr. Jones is an amazing lecturer! I would love to hear about implicit bias in the healthcare workforce.	2
76	Gibbs Lecture	Mayo employee newsletter	3	2	2	55901	1	0	0	0	0	2	0	0	0	0	0	0	0	5	5	1		1	4	4	5	4	5	8	8	6	6	8	3	3	5	5		2
77	Gibbs Lecture	advertisement	6	1	1	55902	0	1	0	0	0	2	1	0	1	0	1	0	0	5	5	1	1	1	6	3	5		6	8	6	6	8	8	8	8	8	8		2
78	Gibbs Lecture	informing	6	1	1	55901	1	0	0	0	0	2	1	0	0	0	0	0	1	5	4	1	1	1	6					6							8	8		2
79	Gibbs Lecture	Dr. Camera Jones	6		2	55901	1	0	0	0	0		1	0	0	0	0	1	0	5	5	1		1	5	5	4	8	5	8	5	6	8	5	5		5		o more discussions o private commitments o measurements - goals	2
80	Gibbs Lecture	newspaper, email	6	1	1	55906	0	1	0	0	0	2	1	1	0	0	0	0	0	5	5	1	1	1	8	4		8	8	8	8	8	8		4	4	8	8		2
81	Listening Sessions	referred	6	2	2	55901	0	1	0	1	0	2	1	0	0	1	0	0	0	4	4	1	1	1	4	8	6	7	7	4	2	6	7	8	6	8	4	4	Genealogy and health care conditions (usually chronic or genetic)	2
82	Listening Sessions	neighbors	3	1	1	55901	0	1	0	0	0	2	0	0	0	0	0	0	0	4	4	2	1	1	5	5	3	7	4	5	6	3	3	4	7	5	7	5		2
83	Listening sessions	Email received	6	1	1	55901	0	1	0	0	0	2	1	0	1	1	0	0	0	5	2	1	1	1	6	8	8	8	8	6	8	8	8	8	8	8	4	3	Diabetes and chronic disease Support groups and access issue to health care	0
84	March 2 2016	Co-worker	4	2	2	55901	0	0	1	0	0	2	1	0	0	0	0	0	0	5	4	1	1	1	3	3		5	2	4	3		6	2	2	3	3	2		2
85	March 2 2016	Email	4	1	1	55906	0	1	0	0	0	2	0	0	0	0	0	0	0	5	4	1	1	1	5	6	5	6	6	8	6	5	6	6	6	6	6	6		2
86	March 2 2016	Supervisor - Angie	4	2	2	55902	0	1	0	0	0	2	1	0	0	1	0	0	0	5	5	1	1		6	5	5	6	6	6	8	5	6	6	5	8	8	8		2
87	March 2 2016	Co-worker	2	2	2	55901	0	1	0	0	0	2	0	0	0	0	0	0	0	4	5	1	1	1	3	2	5	2	2			5	4	3	4	4	2	4		2
88	March 2 2016 YMCA	YMCA Staff	6	1	1	55902	0	1	0	0	0	2	0	0	0	0	0	0	0	4	4	1	1	1	5	5	5	5	5	6	6	6	6	6	5	6	5	6		2
89	March 2 2016 YMCA	Anjie	3	1	1	55901	0	1	0	0	0	2	0	0	0	0	0	0	0	5	4	1	1		8	8	6	6	6	6	8	8	6	8	5	8	5	8		2
90	March 2 2016 Olmsted County Health Assessment	Email from Mayo Clinic	5	1	1	55904	0	1	0	0	0	2	0	0	0	0	0	0	0	5	5	1	1	1	4	5	4	4	4	4	5	6	6	6	4	6	4	6		2
91	March 2 2016	Co-worker	3	2	2	55901	0	0	1	1	0	2	0	0	0	0	0	0	0	5	5	1		2	4	7	7	7	7	5	3	3	4	3	7	4	3	4		2
92	March 9 2016 Listening Native Health		2	2			1	0	0	0	1	2	0	0	0	0	0	0	0	5		1	1	2	4	8	3	7	5		8	5	4	6	8	8	8	8	:)	2
93	March 9 2016 Listening Session for Native American	CCaTS CD! MERG	5	1	1	55902	0	0	1	0	0	2	0	0	0	0	0	0	0	4	4	1	1	1	5	5	5	5	6	8	6	6	8	8	6	8	5	8		2
94	March 9 2016 Listening Session Native Health		5	2	2	14221	0	0	0	0	1	2	0	0	0	0	0	0	0	5	4	1		1																2
95	March 9 2016 Listening Session for NA CHNA AI/AN	Tabitha Brockman, Betty Smith	3	2	2	55901	0	0	0	0	1	2	0	0	0	0	0	0	0		3	1	1	2	4	4	3	4	4	5	5	4	5	5	4	4	4	5		2
96	March 9 2016	Ashok and Sumedha	6	1	1	55902	0	1	0	0	0	2	1	0	1	1	1	1	0	4				1	8	8	8	8	8	8	8	8	8	8	8	8	8	8		2
97	March 9 2016 Listening Session for Native America	Tabetha	6	2	2	55904	0	1	0	0	0	2	1	0	1	1	1	0	0	5	5			1	4	5	6	5	6	8	8	8	6	8	8	8	8	8	Have more of these sessions	2
98	March 9 2016 Listening Session NA interest	email message	5	2	2	55906	0	0	0	0	1	2	1	0	1	0	0	0	0	5	5	1		1	6	7	6	6	7	8	7	6	6	6	2	5	8	8	generational trauma in NAs	2
99	March 9 2016 Listening Session NA	Scheduling conflict	5	2	2	55904	0	1	0	0	0	2	1	1	1	0	0	0	0	4	4	1	1	2	2	2	2	4	3	4	4	4	6	8	2	5	4	6		2
100	listening sessiob sudanes	pastor Agustino	4	2	2	55901	1	0	0	0	0	2	0	0	0	0	0	0	0	5	4	1	1	1	5	8	3	4	4	8	8	8	8	8	5	4	8	3	just want to learn more about mental Health and finacial	0
101	sudanes listening session	n/a	5	1	1	55901	1	0	0	0	0	2	0	0	0	0	0	0	0	5	5	1	1	1	5	5	5	5	5	8	8	8	8	8	8	6	8	6		0
102	sudanese listening session	church pastor	3	1	1	55901	1	0	0	0	0	2	0	0	0	0	0	0	0	5	5	1	1	1	3	3	3	3	3	8	8	8	8	8	2	4	6	6	I would really like mental health lerningg for the community	0
103	sudanese listening session	church	3	2	2	55901	1	0	0	0	0	2	1	0	1	0	0	1	0			2	2																	0
104	sudanese listening session	church	3		2	55901	1	0	0	0	0	2	0	0	0	0	0	0	0			1	1	1	4	8	5	6	3						2	3	5	8		0
105	sudanese listening session	friends family	1	1	1	55901	1	0	0	0	0		1	0	0	0	0	1	0	4	4	1	1	1	3	2	3	3	3	4	5	4	4	6	4	5	6	6		0
106	sudanese listening session	today in church		2		55901	1	0	0	0	0	2	1	0	0	0	0	1	0																2	3	6	6	about kids in school specially Africans, Day care and problems at work place	0
107	sudanese listening session	pastor	4	2	2	55904	1	0	0	0	0		1	0	0	0	0	1	0	4	5	1	1	1	2	4	6	5	3	6	6	5	8	6	7	2	6			0
108	sudanes listening session	pastor Agustino	4	2	2	55901	1	0	0	0	0		1	0	0	0	0	0	0	5	5	1	1	1	8	8	8	6	6	8	8	8	8	8	8	6	8	8		0
109	sudanes listening session		3	2	2	55901	1	0	0	0	0	2	0	0	0	0	0	0	0	5	5	1		1	8	8	6	8	6	8	8	6	8	8	8	6	8	6		0
110	sudanes listening session	by computer	4	2		55904	1	0	0	0	0	2	0	0	0	0	0	0	0	4		1	1	1	6		3	2			3				4	6	5	3	thank you for coming today and learn something new today	0
111	sudanese listening session	very good	5	1	1	55904	1	0	0	0	0	2	0	0	0	0	0	0	0	3	4	1	1	2	5	6	5	8	6	6	6	5	6	5	6	5	4	5	I hope this happen another time	0
112	sudanese listening session		1	1	1	55901	1	0	0	0	0	2	1	0	1	0	0	0	0		3	1	1	2																0
